# Supplementary material
Source: Royal Society of Chemistry journal article supplement (doi:10.1039/d5ya00362h)
Supplement: d5ya00362h1.pdf [file d5ya00362h1.pdf]

## Supplementary information

### Engineering Al/Fe Dual-Doped Nanoporous ZnO Nanorods for Efficient Visible-Light-Driven Photoelectrochemical Hydrogen Evolution

<sup>a</sup> Mustafa Majid Rashak Al-Fartoos, <sup>a</sup> Asif Ali Tahir, <sup>b</sup> Martin Smith

<sup>a</sup> Solar Energy Research Group, Environment and Sustainability Institute, University of Exeter, Penryn Campus, Cornwall TR10 9FE, U.K.

<sup>b</sup> School of Applied Sciences, University of Brighton, Brighton, UK.

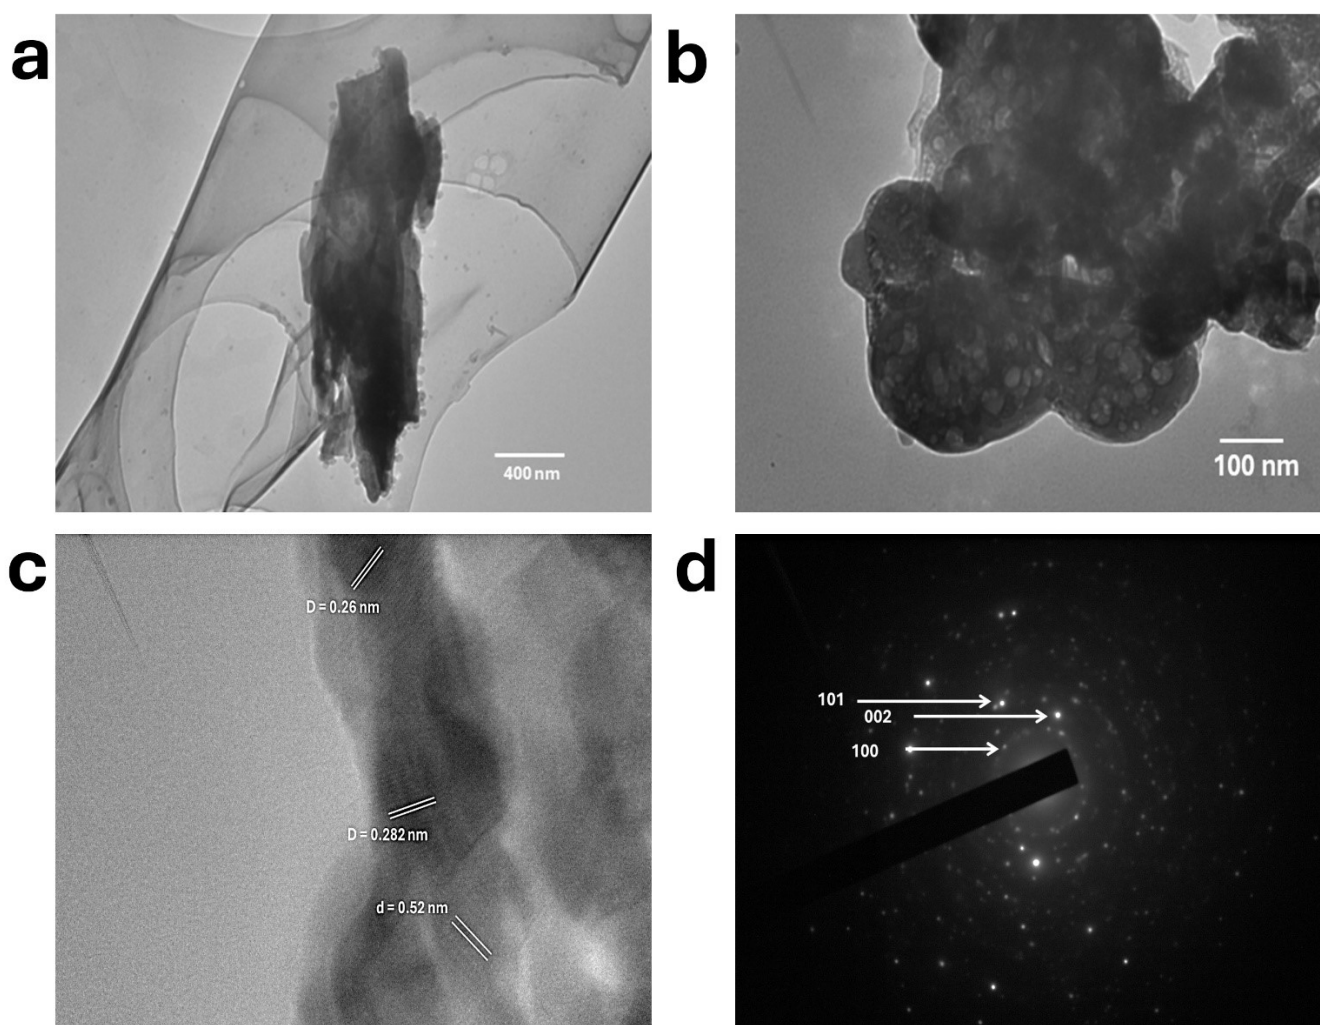

**Figure S1.** TEM analysis of dual-doped ZnO nanoporous nanorods. Bright-field images show fragmented nanorods with a nanoporous structure (pore size ~20–70 nm) due to sample preparation at (a) 400 nm and (b) 100 nm scales. (c) HRTEM reveals lattice fringes corresponding to (002) and (100) planes of wurtzite ZnO, indicating polycrystallinity. (d) SAED pattern confirms the hexagonal wurtzite phase.

**Table S1.** Elemental quantification of the dual-doped ZnO nanorod film obtained from TEM-EDS analysis, showing the atomic percentage of Zn, Al, and Fe, confirming successful dual doping.

| No | Element | at.%  |
|----|---------|-------|
| 1  | Zn      | 65.05 |
| 2  | O       | 32.53 |
| 3  | Al      | 0.21  |
| 4  | Fe      | 2.21  |

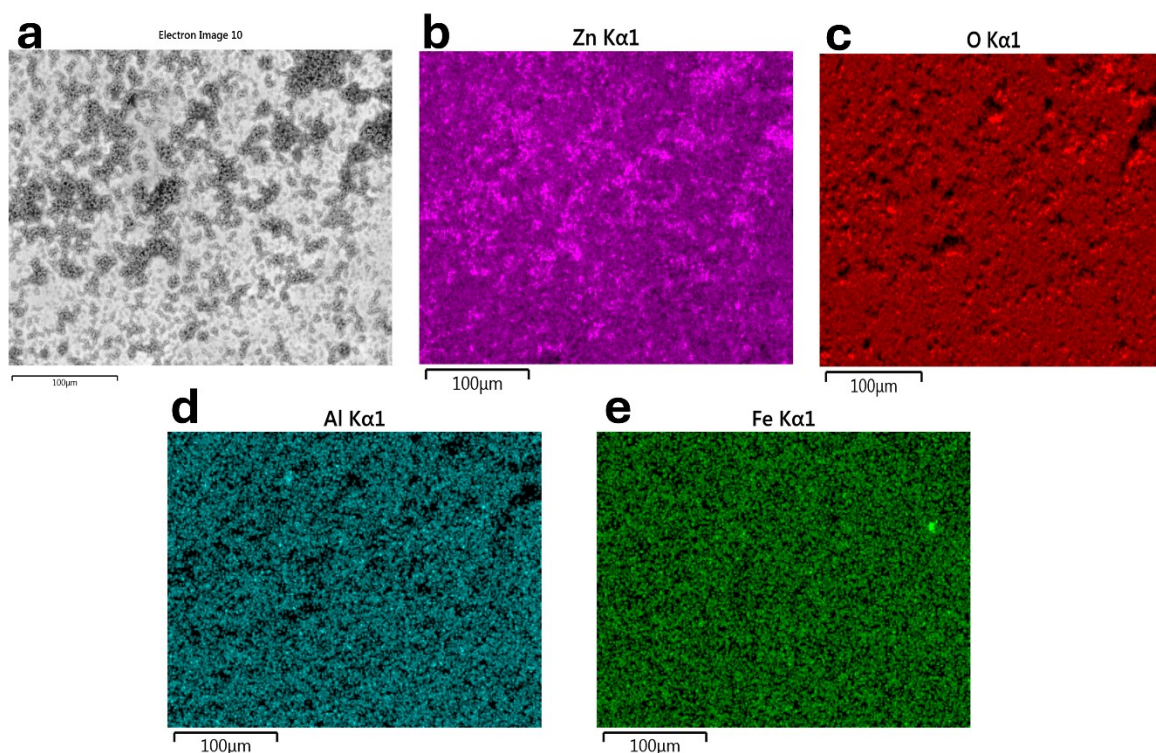

Figure S2. EDS elemental mapping of the Al/Fe co-doped ZnO nanorods. (a) SEM image of the analysed region (100 μm scale). Elemental maps of (b) Zn (c) O, (d) Al, and (e) Fe.

**Table S2.** Elemental quantification of the dual-doped ZnO nanorod film obtained from SEM-EDS analysis, showing the atomic percentage of Zn, Al, and Fe, confirming successful dual doping.

| No | Element | at.%  |
|----|---------|-------|
| 1  | Zn      | 54.56 |
| 2  | O       | 45.28 |
| 3  | Al      | 0.06  |
| 4  | Fe      | 0.1   |

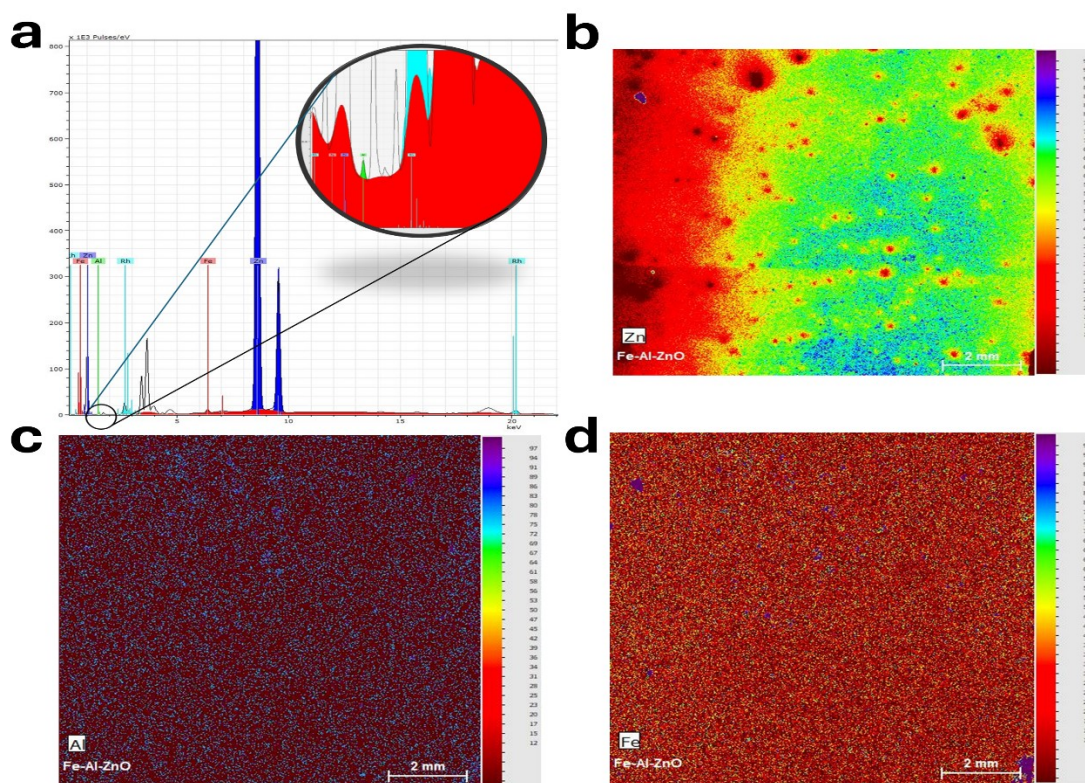

Figure S3. Micro X-ray fluorescence ( $\mu$ -XRF) analysis of Fe–Al co-doped ZnO nanorods. (a)  $\mu$ -XRF spectrum showing characteristic Zn , Al , and Fe emission peaks, confirming the successful incorporation of dopants. Elemental mapping images of (c) Zn, (b) Al, and (d) Fe demonstrate that Zn is uniformly distributed across the nanorod film with different thickness, while Al and Fe exhibit a homogeneous doping profile without observable clustering, indicating successful dual-dopant.

**Table S3.** Elemental quantification of the dual-doped ZnO nanorod film obtained from  $\mu$ -XRF analysis, showing the atomic percentage of Zn, Al, and Fe, confirming successful dual doping.

| No | Element | at.%  |
|----|---------|-------|
| 1  | Zn      | 78.27 |
| 2  | O       | 20.27 |
| 3  | Al      | 1.06  |
| 4  | Fe      | 0.40  |

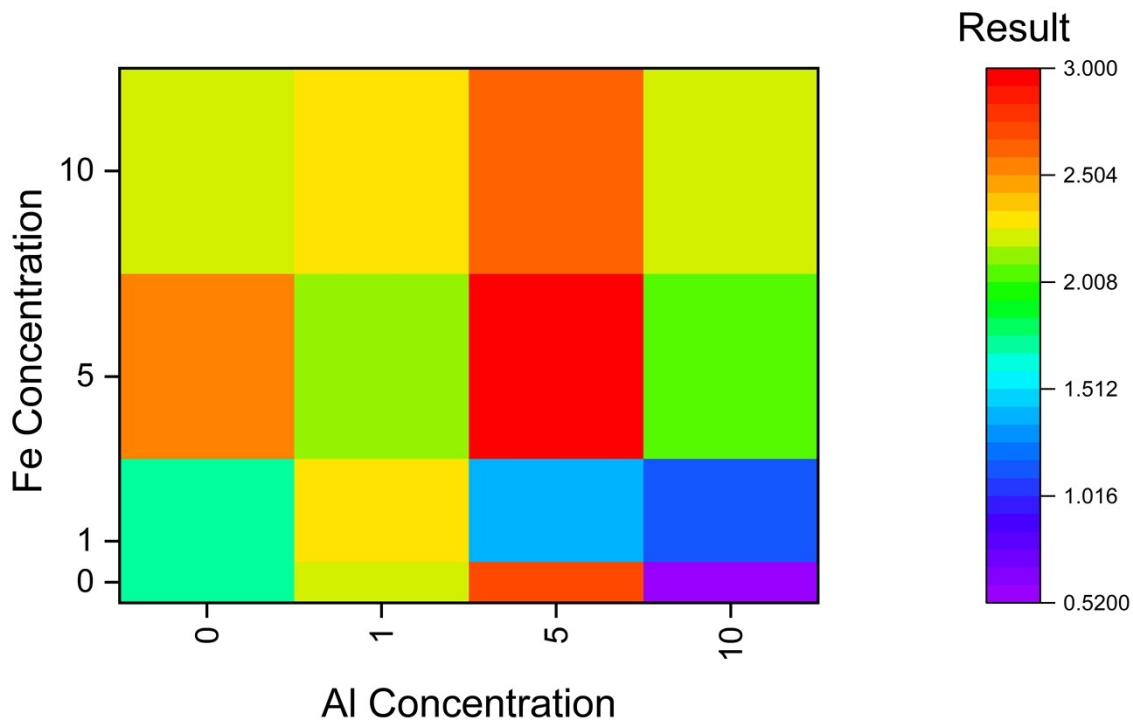

Figure S4. Heatmap illustrating the optimization of Al and Fe co-doping on photoelectrochemical (PEC) performance, measured at 1 V vs. RHE. X axis shows the concentration of Al at 0,1,5,10 % and y axis shows the concentration of Fe at 0,1,5,10%.

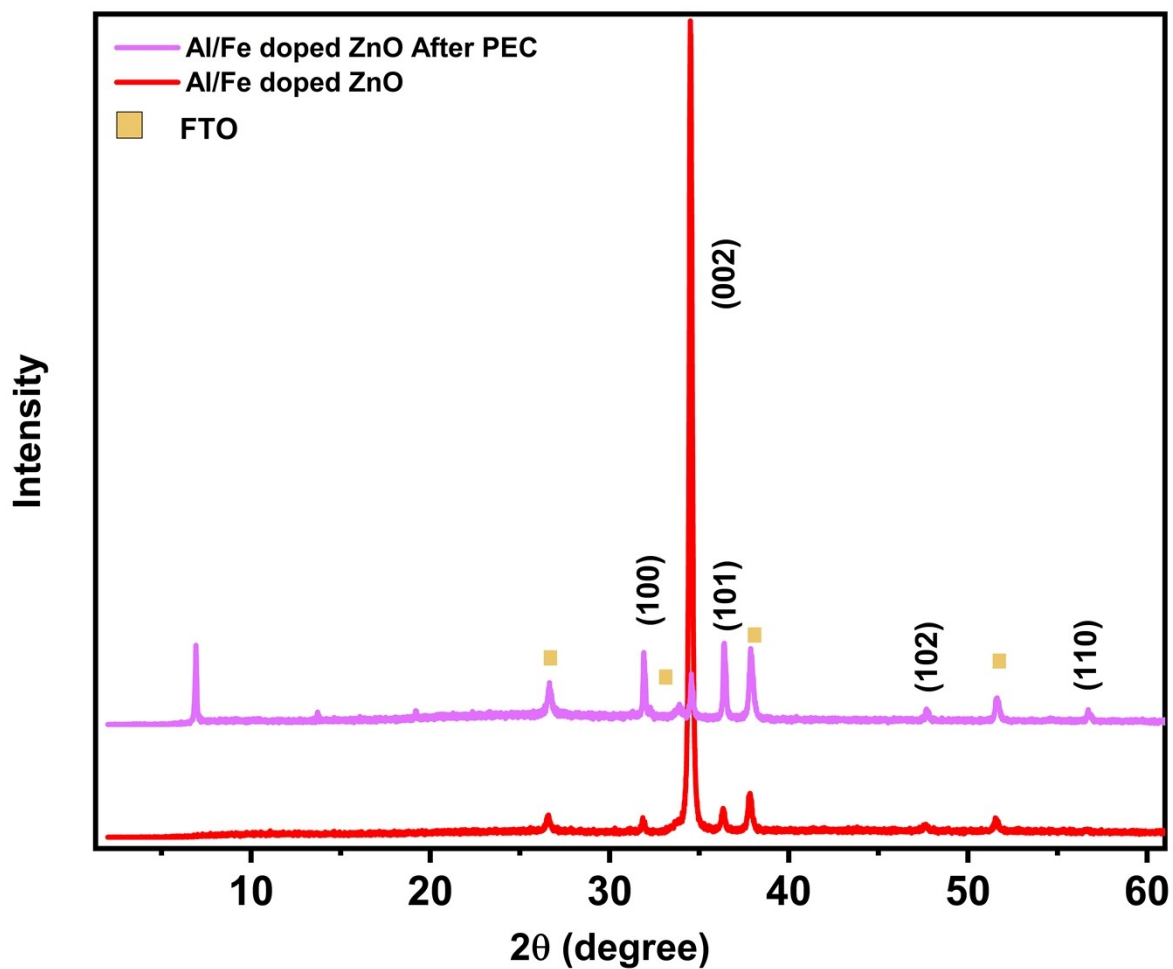

Figure S5. XRD patterns of Al/Fe co-doped ZnO recorded before and after 5 h of photoelectrochemical (PEC) testing.

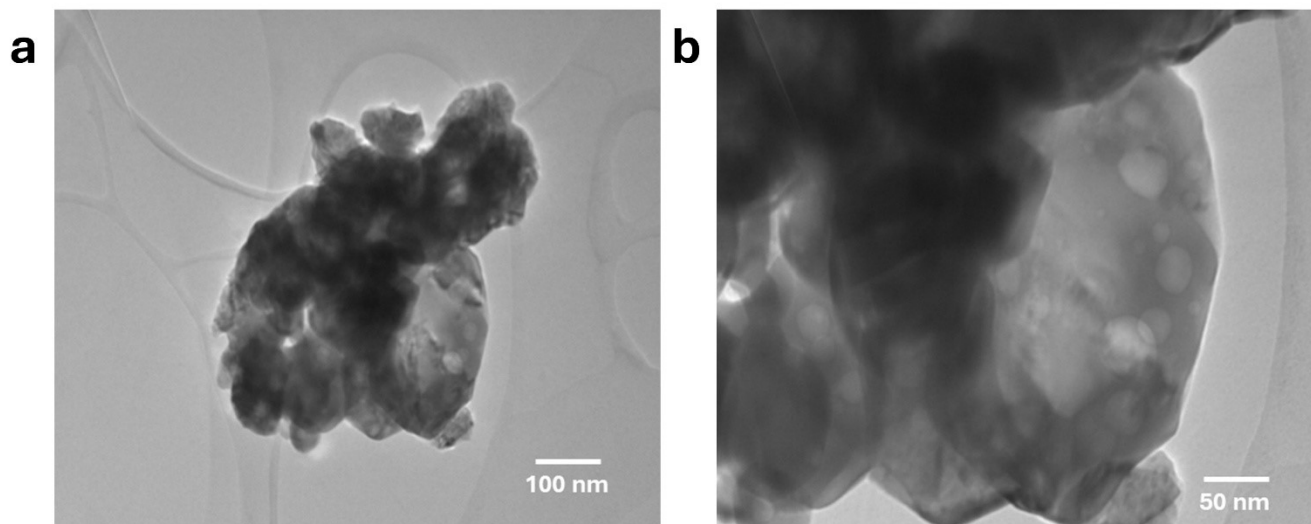

**Figure S6.** TEM images after 5 h of PEC operation in  $\text{Na}_2\text{SO}_3$  electrolyte (pH 9), showing the morphology at (a) 100 nm and (b) 50 nm scales.
